# Supplementary material for: Effect of paternal age on offspring birth defects: a systematic review and meta-analysis
Source: PubMed Central journal article supplement (PMC7803514; doi:10.18632/aging.104141), 2020-11-20
Supplement: aging-12-104141-s001.pdf [file aging-12-104141-s001.pdf]

SUPPLEMENTARY FIGURES

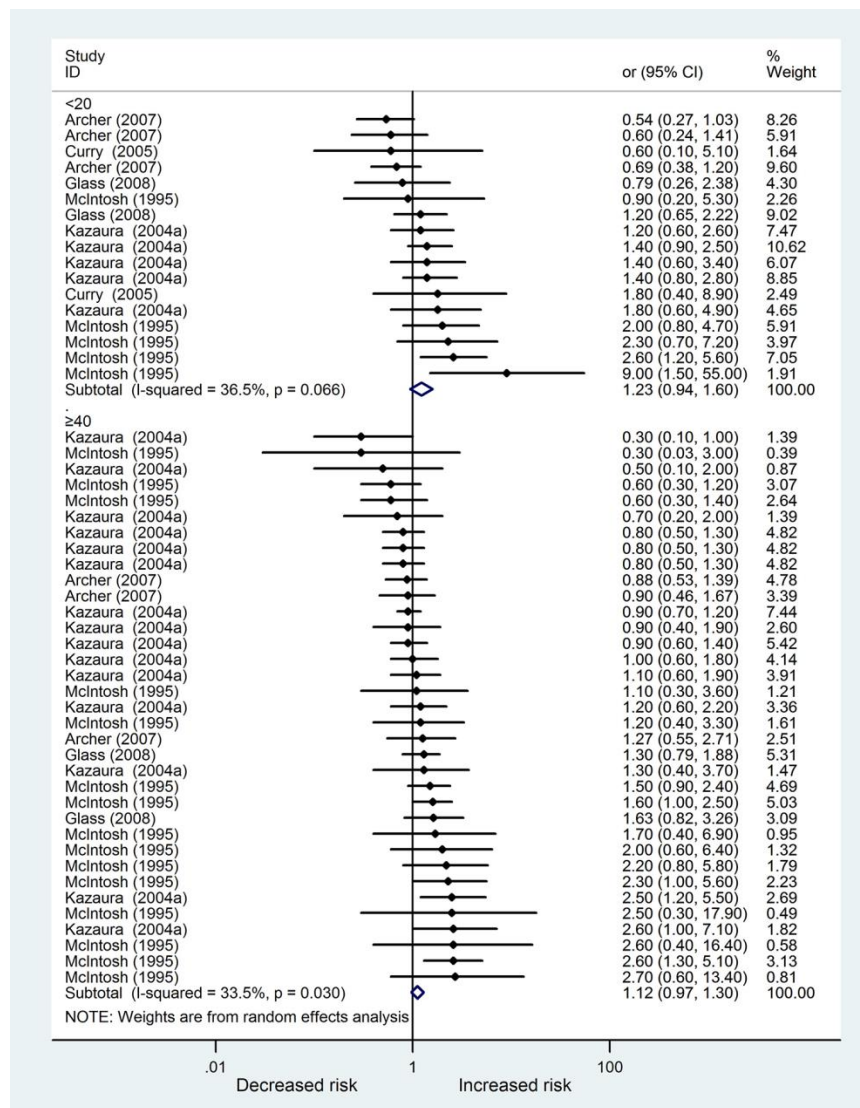

**Supplementary Figure 1. Forest plot presenting the effect of young and old father on nervous system malformations in their offspring: Five studies were included in the meta-analysis.** The pooled OR in subgroup of young fathers and old fathers was 1.23(95%CI 0.94-1.60) and 1.12(95%CI 0.97-1.30), respectively. There was minimal heterogeneity in these two subgroups ( $I^2=36.5\%$ ,  $33.5\%$ , respectively) amongst the studies.

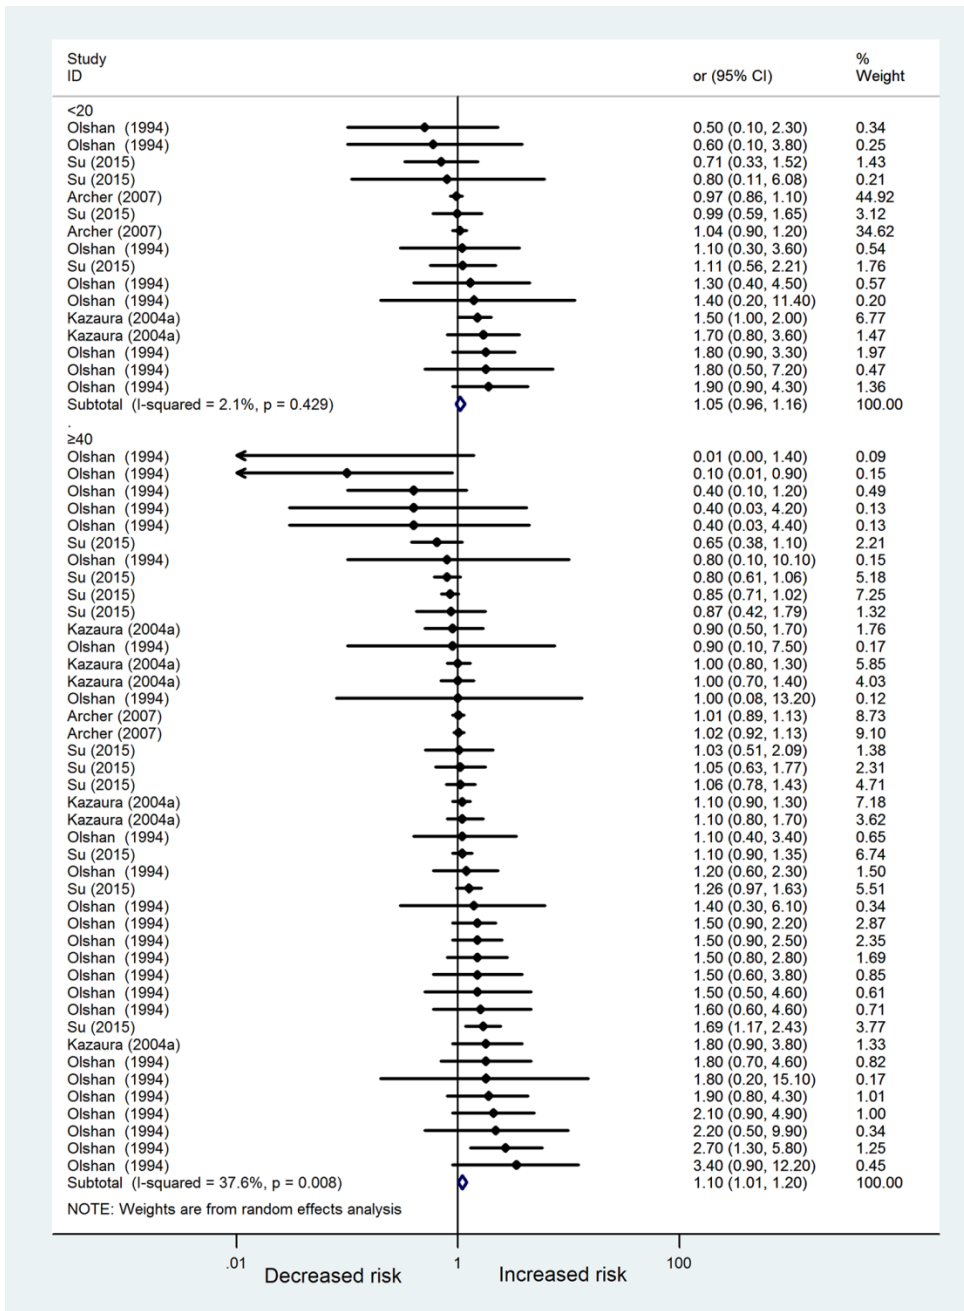

**Supplementary Figure 2. Forest plot presenting the effect of young and old father on cardiovascular abnormalities in their offspring: Meta-analysis of the data based on four studies showed that, compared with fathers aged 25 to 29, younger fathers (<20 years) did not increase the risk of cardiovascular abnormalities in their children, while older fathers (≥40 years) did, the pooled OR was 1.05 (95%CI 0.96-1.16) and 1.10 (95%CI 1.01-1.20), respectively. There was minimal heterogeneity (I<sup>2</sup>= 2.1%, 37.6%, respectively) amongst the studies.**

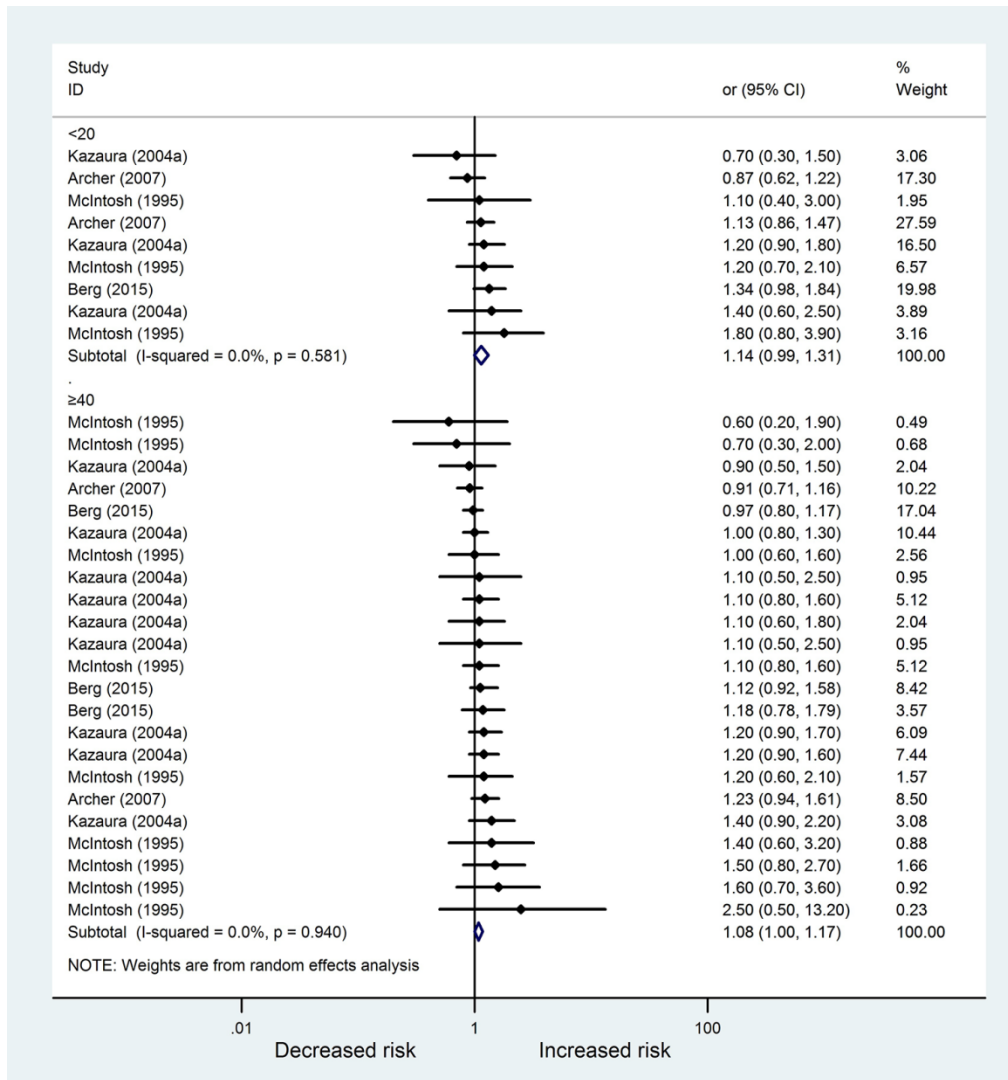

**Supplementary Figure 3. Forest plot presenting the effect of young and old father on facial deformities in their offspring: Four studies were included in the meta-analysis.** Older fathers ( $\geq 40$  years) slightly increase the risk of facial deformities in their children, while younger fathers ( $< 20$  years) did not, the pooled OR was 1.08 (95%CI 1.00-1.17) and 1.14 (95%CI 0.99-1.31), respectively. There was no heterogeneity in these two subgroups ( $I^2=0.0\%$ ,  $0.0\%$ , respectively) amongst the studies.

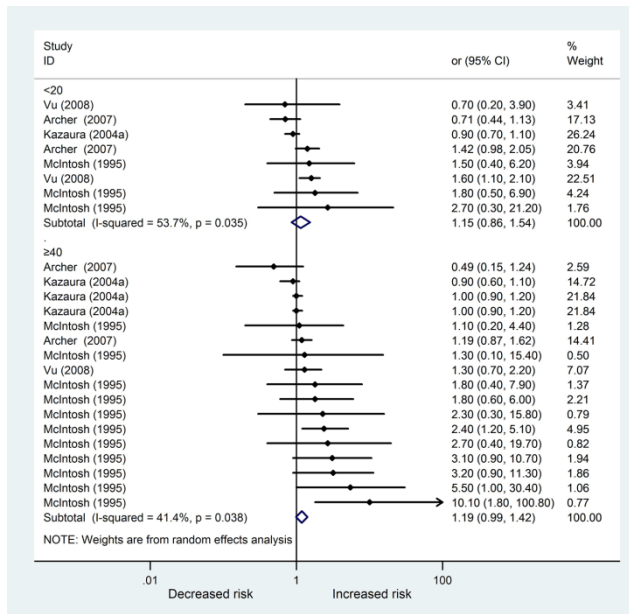

**Supplementary Figure 4. Forest plot presenting the effect of young and old father on musculoskeletal abnormalities in their offspring: Five studies were included in the meta-analysis and the results showed that, compared with fathers aged 25 to 29, younger fathers (<20 years) and older fathers (≥40 years) did not increase the risk of musculoskeletal abnormalities in offspring, the pooled OR was 1.15 (95%CI 0.86-1.54) and 1.19 (95%CI 0.99-1.42), respectively. There was medium heterogeneity (I<sup>2</sup> = 53.7%, 41.4%, respectively) amongst the studies.**

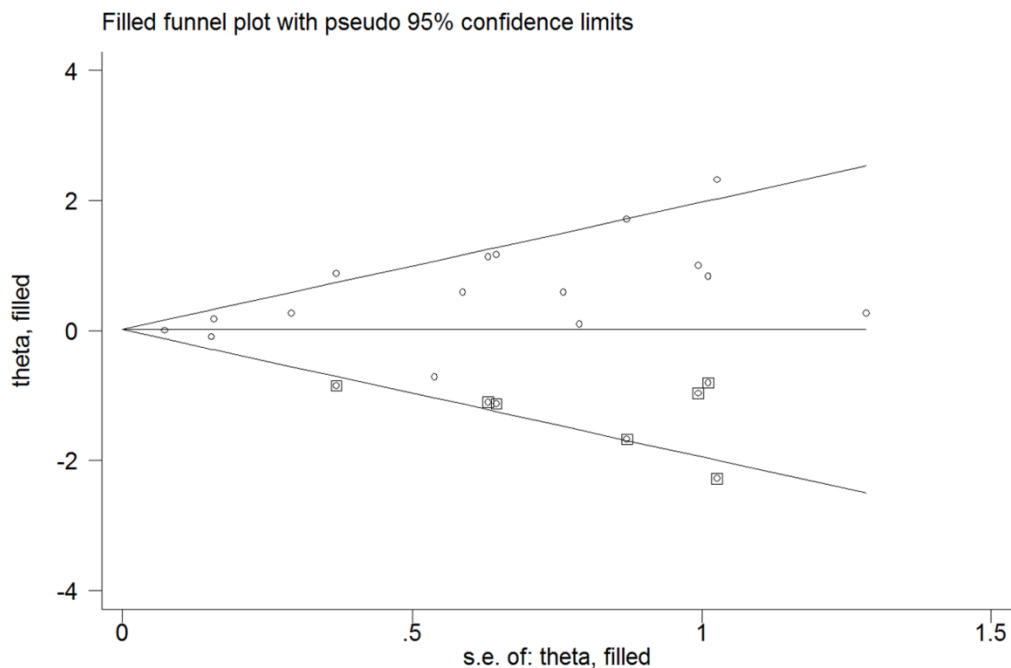

**Supplementary Figure 5. The Funnel plots after correcting publication bias in the subgroup of old father by the nonparametric trim and fill method: After correcting publication bias in the subgroup of old fathers by the nonparametric trim and fill method, the pooled OR was still not statistically significant (OR 1.039; 95%CI 0.841-1.284). The dots represent the included studies, and the little square represents complementary studies.**

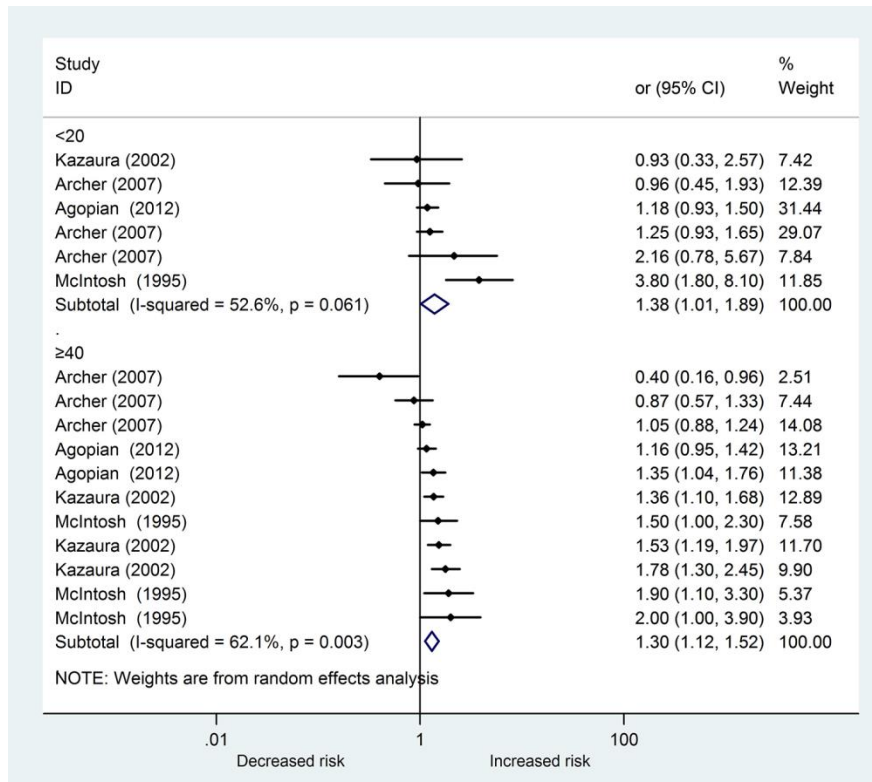

**Supplementary Figure 6. Forest plot presenting the effect of young and old father on chromosome disorders in their offspring: Meta-analysis including four studies which showed a moderate high risk of chromosome disorders in newborns of both young and old fathers (OR 1.38, 95%CI 1.01-1.89; OR 1.30, 95%CI 1.12-1.52, respectively), compared with the reference fathers (25-29 years). There was medium heterogeneity ( $I^2= 52.6\%$ ,  $62.1\%$ , respectively) amongst the studies.**
