# Supplementary material for: Effect of paternal age on offspring birth defects: a systematic review and meta-analysis
Source: PubMed Central journal article supplement (PMC7803514; doi:10.18632/aging.104141), 2020-11-20
Supplement: aging-12-104141-s002.pdf [file aging-12-104141-s002.pdf]

## Supplementary Table

**Supplementary Table 1. Classification of 7 congenital malformations according to PubMed database.**

| Classification                 | Birth defects                                                                                                                                                                                                                                                                                                                                                                                                                                                               | Links                                                                                               |
|--------------------------------|-----------------------------------------------------------------------------------------------------------------------------------------------------------------------------------------------------------------------------------------------------------------------------------------------------------------------------------------------------------------------------------------------------------------------------------------------------------------------------|-----------------------------------------------------------------------------------------------------|
| Urogenital abnormalities       | bladder extrophy, cryptorchidism, disorders of sex development, epispadias, Fraser syndrome, fused kidney, hypospadias, multicystic dysplastic kidney, hereditary nephritis, pyelectasis, and retrocaval ureter                                                                                                                                                                                                                                                             | <a href="https://www.ncbi.nlm.nih.gov/mesh/68014564">https://www.ncbi.nlm.nih.gov/mesh/68014564</a> |
| Digestive system abnormalities | anorectal malformations, imperforate anus, biliary atresia and choledochal cyst, diaphragmatic eventration, esophageal atresia, Hirschsprung disease, intestinal atresia, Meckel's diverticulum, and pancreaticobiliary maljunction                                                                                                                                                                                                                                         | <a href="https://www.ncbi.nlm.nih.gov/mesh/68004065">https://www.ncbi.nlm.nih.gov/mesh/68004065</a> |
| Nervous system abnormalities   | agenesis of corpus callosum, central nervous system cysts, central nervous system vascular malformations, Dandy–Walker syndrome, hereditary sensory and autonomic neuropathy, hereditary sensory and motor neuropathy, hydranencephaly, malformations of cortical development, neural tube defects, optic nerve hypoplasia, and septo-optic dysplasia                                                                                                                       | <a href="https://www.ncbi.nlm.nih.gov/mesh/68009421">https://www.ncbi.nlm.nih.gov/mesh/68009421</a> |
| Cardiovascular abnormalities   | Congenital heart defects and vascular malformations                                                                                                                                                                                                                                                                                                                                                                                                                         | <a href="https://www.ncbi.nlm.nih.gov/mesh/68018376">https://www.ncbi.nlm.nih.gov/mesh/68018376</a> |
| Facial deformities             | congenital microtia, eye abnormalities, and stomatognathic system abnormalities                                                                                                                                                                                                                                                                                                                                                                                             | <a href="https://www.ncbi.nlm.nih.gov/mesh/68000013">https://www.ncbi.nlm.nih.gov/mesh/68000013</a> |
| Musculoskeletal abnormalities  | arthrogryposis, campomelic dysplasia, cervical rib syndrome, craniofacial abnormalities, funnel chest, gastroschisis, Hajdu–Cheney syndrome, congenital hip dislocation, Klippel–Feil syndrome, laryngomalacia, congenital limb deformities, pectus carinatum, synostosis, and tracheobronchomalacia                                                                                                                                                                        | <a href="https://www.ncbi.nlm.nih.gov/mesh/68009139">https://www.ncbi.nlm.nih.gov/mesh/68009139</a> |
| Chromosome disorders           | 22q11 deletion syndrome, Angelman syndrome, Beckwith–Wiedemann syndrome, branchiootorenal syndrome, Cri du Chat Syndrome, De Lange syndrome, Down syndrome, holoprosencephaly, Jacobsen distal 11q deletion syndrome, Prader–Willi syndrome, Rubinstein–Taybi syndrome, sex chromosome disorders, Silver–Russell syndrome, Smith–Magenis syndrome, Sotos syndrome, Trisomy 13 syndrome, Trisomy 18 syndrome, WAGR syndrome, Williams syndrome, and Wolf–Hirschhorn syndrome | <a href="https://www.ncbi.nlm.nih.gov/mesh/68025063">https://www.ncbi.nlm.nih.gov/mesh/68025063</a> |
